# Supplementary material for: Boosting the reduction of CO2 and dimethylamine for C–N bonding to synthesize DMF via modulating the electronic structures of indium single atoms
Source: Royal Society of Chemistry journal article supplement (doi:10.1039/d4ee05681g), 2025-01-01
Supplement: d4ee05681g1.pdf [file d4ee05681g1.pdf]

**Boosting Reduction of CO<sub>2</sub> and Dimethylamine for C-N Bonding to Synthesizing DMF Via Modulating the Electronic Structures of Indium Single Atom**

Jingui Zheng,<sup>[a]</sup> Shaohan Xu,<sup>[a]</sup> Lingzhi Sun,<sup>[a]</sup> Xun Pan,<sup>[a]</sup> Qihao Xie,<sup>[a]</sup> and Guohua Zhao\*<sup>[a]</sup>

<sup>a</sup> School of Chemical Science and Engineering, Key Laboratory of Spine and Spinal Cord Injury Repair and Regeneration, Ministry of Education, Tongji Hospital, Tongji University, Shanghai 200092, People's Republic of China.

E-mail: g.zhao@tongji.edu.cn

## Experimental Procedures

### Synthesis of Indium single atom catalysts with different nitrogen coordination

**(InN<sub>4</sub> and InN<sub>3</sub>):** Dissolve 5.6g of zinc nitrate and 0.2g of indium nitrate in 40ml of methanol and stir evenly. And dissolve 12.3g of dimethylimidazole in 40ml of methanol and stir for 3 hours to obtain ZIF-8. Slowly add the salt solution of zinc nitrate and indium nitrate dropwise to the solution of dimethylimidazole, stir for 12 hours, and centrifuge and filter. Take the filtered precipitate, vacuum dry for 12 hours, and grind the dried block shaped white solid into powder to obtain indium doped ZIF-8 powder. By controlling the calcination temperature, these white powders were subjected to high-temperature calcination to obtain indium single atom catalysts with different nitrogen coordination. Place the indium doped ZIF-8 powder sample into a covered crucible and place it flat in a tube furnace. Under the protection of a nitrogen atmosphere, raise the temperature at a rate of 5 °C min<sup>-1</sup> to 900 °C and hold for 3 hours, then cool naturally to room temperature to obtain In-N<sub>4</sub>; Place indium doped ZIF-8 powder sample in a covered crucible and place it flat in a tube furnace. Under the protection of a nitrogen atmosphere, raise the temperature at a rate of 5 °C min<sup>-1</sup> to 1000 °C and hold for 3 hours. Cool naturally to room temperature to obtain an unsaturated coordinated indium nitrogen triple coordinated indium single atom In-N<sub>3</sub> catalyst

### Material characterization and product detection

The X-ray diffraction (XRD, D8 Focus X-ray diffractometer, Bruker, Germany) was used to test the crystal structure of the catalyst, and the morphology of the catalyst was observed by high resolution transmission electron microscope (HR-TEM, JEM 2100). The elemental composition and chemical valence states of the InN<sub>4</sub> and InN<sub>3</sub> single atom catalysts were characterized using X-ray photoelectron spectroscopy (XPS, AXIS Ultra DLD). The extended X-ray absorption fine structure (EXAFS) of InN<sub>3</sub> and InN<sub>4</sub> was detected on the 14w beam line of the Shanghai Synchrotron Radiation Facility (SSRF). The BL14W1 line station uses 38 pole Wiggler inserts with a maximum magnetic field strength of 1.2T. The optical system of the line

station mainly includes a collimating mirror, a liquid nitrogen cooled bicrystal monochromator, a focusing mirror, and a harmonic suppression mirror. The monochromator we use is Si (311) crystal, which can test indium species. During the sample preparation process, we finely grind the sample with a mortar and evenly apply it onto the conductive tape. We place the prepared sample powder in the light window of the line station and adjust the position of the light window so that the light spot shines in the middle of the sample, which is beneficial for testing of synchrotron radiation. Differential electrochemical mass spectrometry (HPR-40 DEMS, Hiden Analytical Ltd) was used analysis of intermediates about synthesis of N, N-dimethylformamide from CO<sub>2</sub> and dimethylamine.

### **Electrochemical synthesis of N, N-dimethylformamide from CO<sub>2</sub> and dimethylamine**

When preparing the electrochemical cathode, 2 mg of InN<sub>4</sub> or InN<sub>3</sub> single atom catalysts were added to 350 μ L ethanol and 50 μL Nafion (5%) were added to 600 μ L deionized water, and sonicated for 3 hours to mix evenly. Spin coat 100 μ L of the mixed sample onto a 1 cm x 1 cm carbon paper. Dry the prepared working electrode at 60 °C for 3 hours. The prepared electrode is the working electrode, platinum plate is used as the counter electrode, and saturated calomel electrode is used as the reference electrode. The electrocatalytic reduction of carbon dioxide and dimethylamine C-N coupled N-formylation to synthesize N, N-dimethylformamide was performed in a self-made reaction cell (6 mL electrolyte).

### **Reaction product detection**

The product N, N-dimethylformamide (DMF) during the electrocatalytic reduction of CO<sub>2</sub> and dimethylamine was determined via high-performance liquid chromatography (HPLC, Aglient 1260) equipped with a C18 column (4.6 × 100 nm, 3.5 μm). The measurement method uses methanol and water as mobile phases (10:90), with a wavelength of 210 nm and a flow rate of 0.6 ml min<sup>-1</sup>.

### **In-situ infrared spectroscopic measurements**

The in-situ electrochemical infrared spectrometer (Nicolet 8700, Thermo Fisher Scientific Inc., USA) was used to detect the reaction intermediates of CO<sub>2</sub> and

dimethylamine C-N coupling to form N, N-dimethylformamide under different potential conditions. The voltage is regulated by the Chenhua CHI660 electrochemical workstation. Disperse  $\text{InN}_4$  and  $\text{InN}_3$  single atom catalyst powders (2 mg) ultrasonically in a mixture of 0.2 mL of water, ethanol, and Nafion in a volume ratio of 60:35:5. Drop the mixed sample (20  $\mu\text{L}$ ) onto a glassy carbon electrode and dry it at 60 °C for 3 hours. The electrochemical cathode, saturated calomel electrode (SCE), and 0.1 mm platinum wire were prepared as the working electrode, reference electrode, and counter electrode, respectively. In a saturated  $\text{CO}_2$  solution of 0.1 M  $\text{KHCO}_3$  + 0.1 M dimethylamine, the scanning potential range is -0.2 to -1.8 V, with a step size of -0.2 V, and real-time in-situ electrochemical infrared spectroscopy is detected.

### Computational method

The Vienna Ab Initio Package (VASP)<sup>1, 2</sup> was used to perform all the density functional theory (DFT) calculations within the generalized gradient approximation (GGA) using the PBE formulation<sup>3</sup>. The ionic cores were described by the projected augmented wave (PAW) potentials<sup>4, 5</sup>. We also take valence electrons into account using a plane wave basis set with a kinetic energy cutoff of 400 eV. Partial occupancies of the Kohn–Sham orbitals were accepted by the gaussian smearing method and a width of 0.05 eV. when the energy change was smaller than  $10^{-5}$  eV, the electronic energy was considered self-consistent. When the force change was smaller than 0.02 eV  $\text{\AA}^{-1}$ , the geometry optimization was considered convergent. The dispersion interactions were described by Grimme’s DFT-D3 methodology<sup>6</sup>.

We constructed a graphene monolayer model using it, and optimized the equilibrium lattice constant of a hexagonal graphene unit cell separated by a vacuum layer at a depth of 15  $\text{\AA}$  to  $a=2.468$   $\text{\AA}$ , with p (5 × 5) periodicity in the X and Y directions and a monolayer in the Z direction. This graphene model consists of 50 carbon atoms. Models 1 and 2 were constructed by doping graphene with  $\text{InN}_3$  and  $\text{InN}_4$ , respectively. The adsorption energy is:  $E_{\text{ads}}=E_{\text{A/Surf}} - E_{\text{Surf}} - E_{\text{A (g)}}$ , where  $E_{\text{A/Surf}}$  is the energy of the adsorption system,  $E_{\text{Surf}}$  is the energy of the  $\text{InN}_4$  or  $\text{InN}_3$  indium single atom surface, and  $E_{\text{A(g)}}$  is the energy of the free molecules  $\text{CO}_2$  and

dimethylamine. If the E value is negative, it indicates that adsorption is an exothermic reaction. The transition state of the elementary reaction is determined by the NEB method, in which the pathway between reactants and products is discretized into five consecutive images, and the structure is optimized to a vertical force of less than 0.02 eV Å<sup>-1</sup>. The free energy of gaseous molecules and surface adsorbates is calculated using the  $G=E+ZPE-TS$  formula, where E is the total energy, ZPE is the zero point energy, T is the Fahrenheit temperature (currently 298.15K), and S is the entropy.

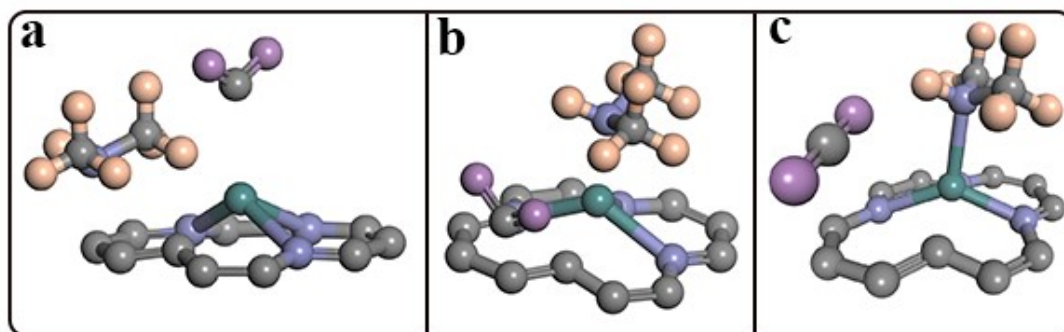

**Fig. S1** adsorption configurations for CO<sub>2</sub> and dimethylamine on InN<sub>3</sub> in DFT calculations. (a) the guess configuration of that CO<sub>2</sub> adsorbed at the indium site and dimethylamine adsorbed at the nitrogen vacancy; (b) the guess configuration of CO<sub>2</sub> adsorbed near nitrogen vacancies and dimethylamine adsorbed at indium sites; (c) the optimized structure for CO<sub>2</sub> and dimethylamine on InN<sub>3</sub> in DFT calculations.

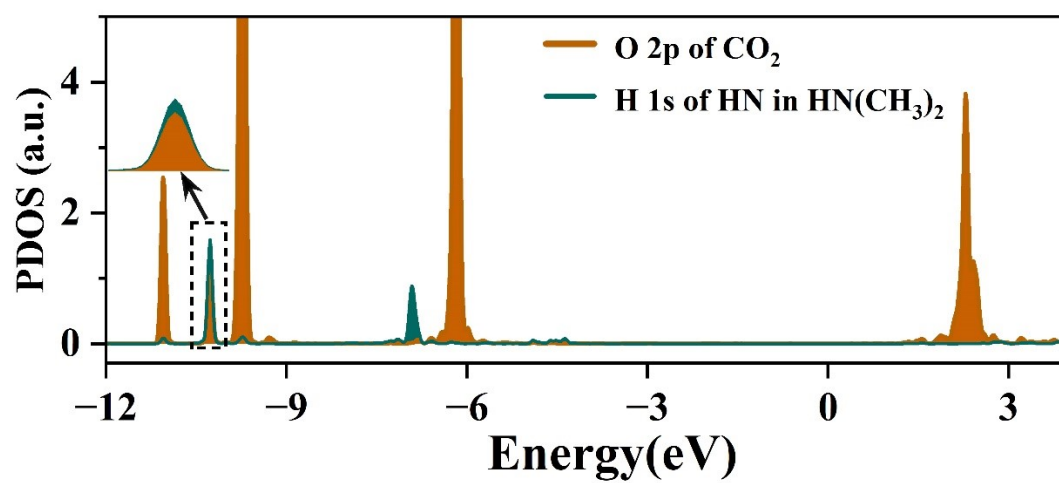

**Fig. S2** PDOS for co-adsorption of HN(CH<sub>3</sub>)<sub>2</sub> and CO<sub>2</sub> on InN<sub>3</sub> catalyst.

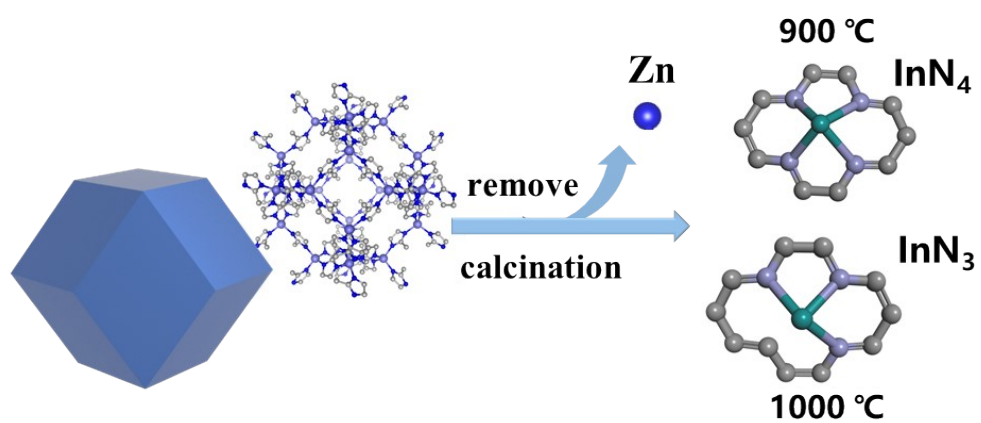

**Fig. S3** Synthetic scheme of indium single-atom catalyst ( $\text{InN}_3$ ,  $\text{InN}_4$ )



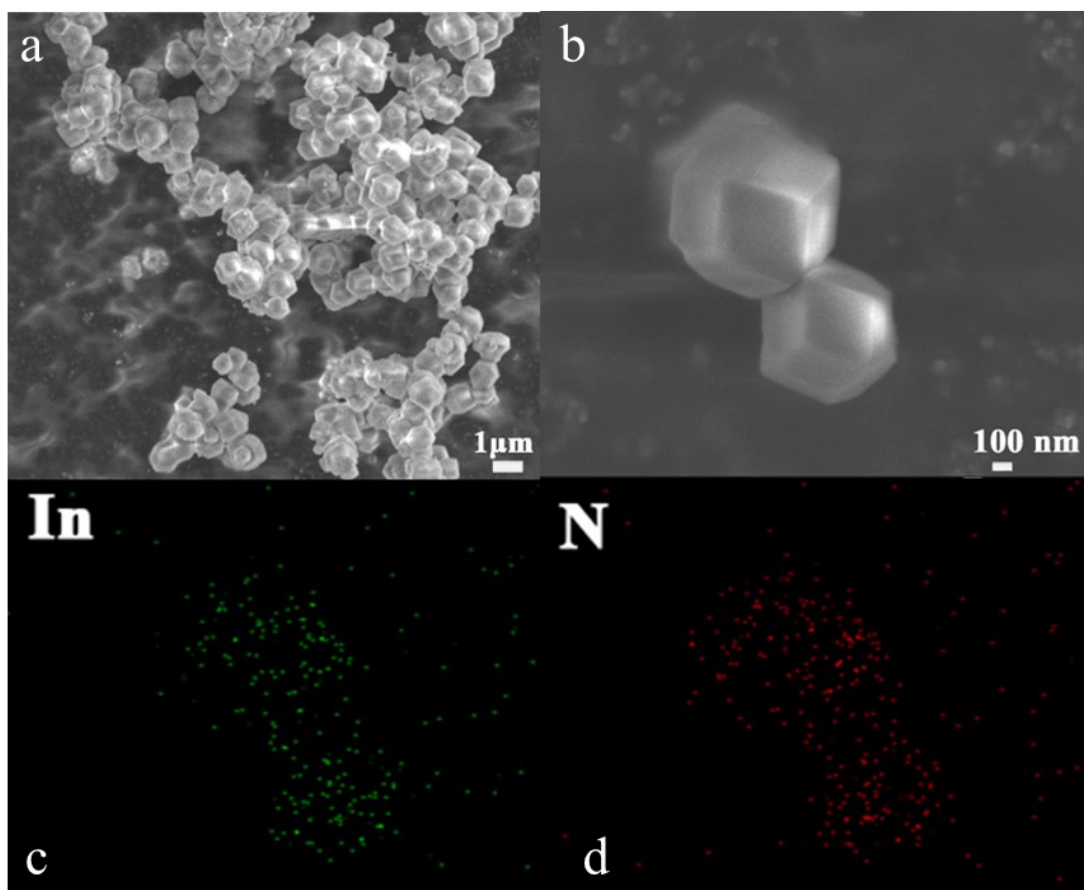

**Fig. S4** Scanning electron microscopy images of nitrogen coordinated indium single atom  $\text{InN}_3$  catalyst (a), (b); Energy dispersive X-ray spectroscopy (EDS) mapping of In and N elements in nitrogen coordinated indium single atom  $\text{InN}_3$  (c), (d).

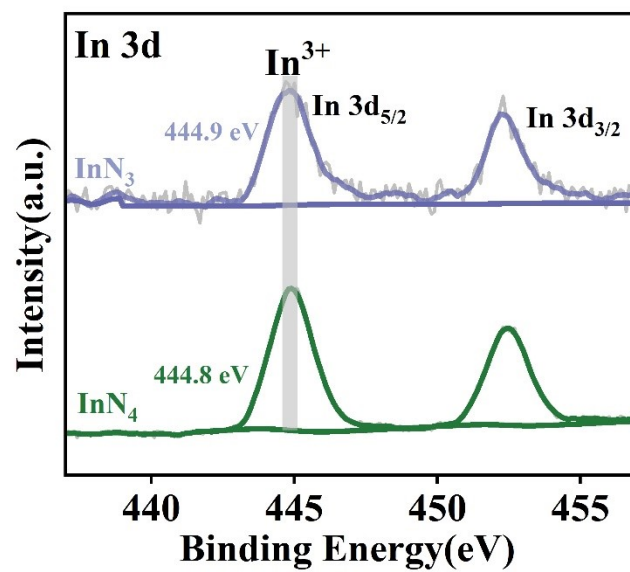

Fig. S5 XPS of In 3d spectra in single atom catalysts InN<sub>3</sub> and InN<sub>4</sub>

**Table S1** K-edge EXAFS data fitting results of In on InN<sub>3</sub> and InN<sub>4</sub>

| Calcination temperature (°C) | shell | CN <sup>a</sup> | R (Å) <sup>b</sup> | $\sigma^2(10^{-3}\text{Å}^2)$ <sup>c</sup> | R factor <sup>d</sup> |
|------------------------------|-------|-----------------|--------------------|--------------------------------------------|-----------------------|
| 900                          | In-N  | 4               | 2.16               | 3.5                                        | 0.0064                |
| 1000                         | In-N  | 3               | 2.10               | 3.2                                        | 0.0192                |

a CN: coordination numbers.

b R (Å): bond distance.

c  $\sigma^2(10^{-3}\text{Å}^2)$ : Debye-Waller factors.

d R factor: goodness of fit.

After calcination of indium doped ZIF-8 material at 900 °C, InN<sub>4</sub> material was obtained. The indium atom is coordinated with four nitrogen atoms, and the bond length of In-N bond was 2.16 Å. The goodness of fit is 0.0064. After calcination of indium doped ZIF-8 material at 1000 °C, the material obtained is InN<sub>3</sub>. The indium atom is coordinated with three nitrogen atoms, and the bond length of In-N bond is 2.10 Å. The goodness of fit is 0.0192. Through the R factor of the two materials, it can be found that the quality of our data fitting is good.

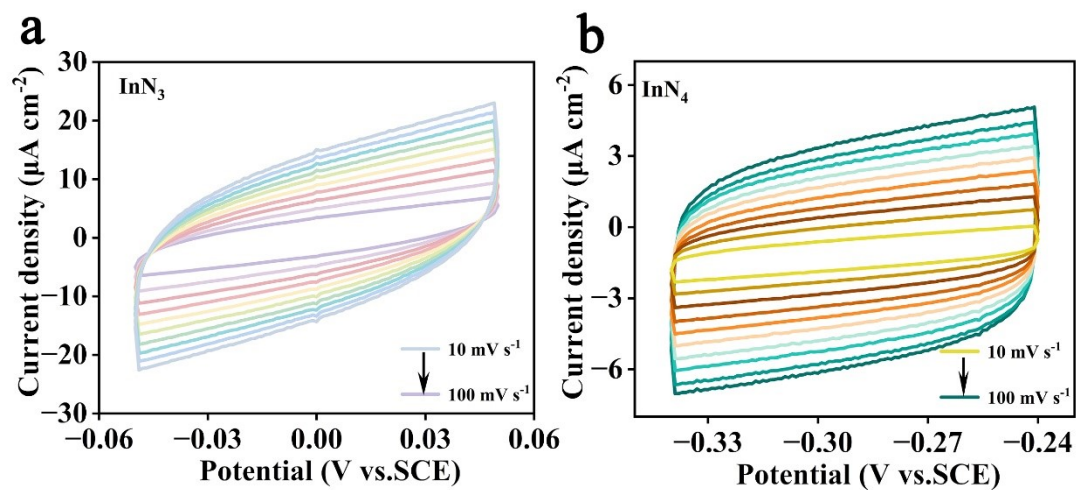

Fig. S6 Cyclic voltammograms of  $\text{InN}_3$  and  $\text{InN}_4$  electrodes at non Faradaic potentials.

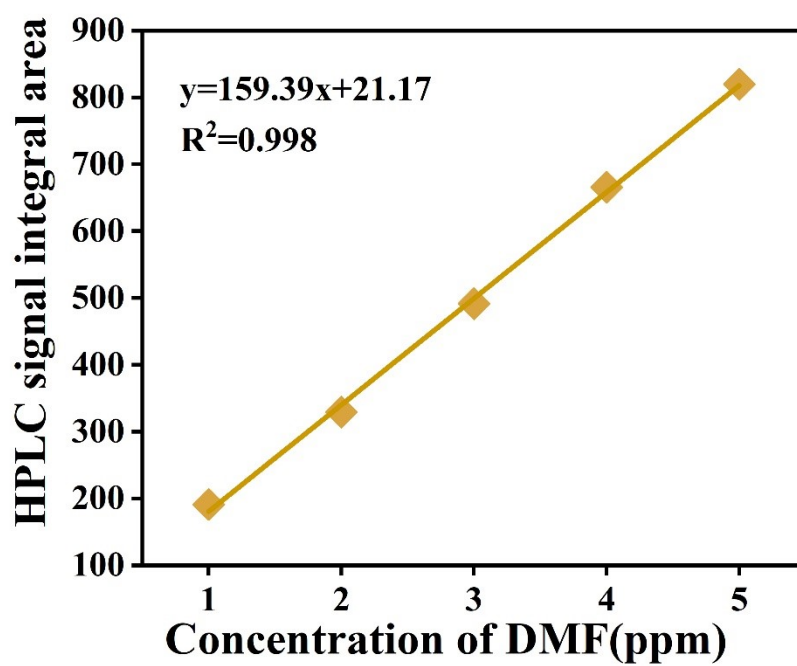

**Fig. S7** calibration curves for quantification of N, N-dimethylformamide (DMF) via HPLC.

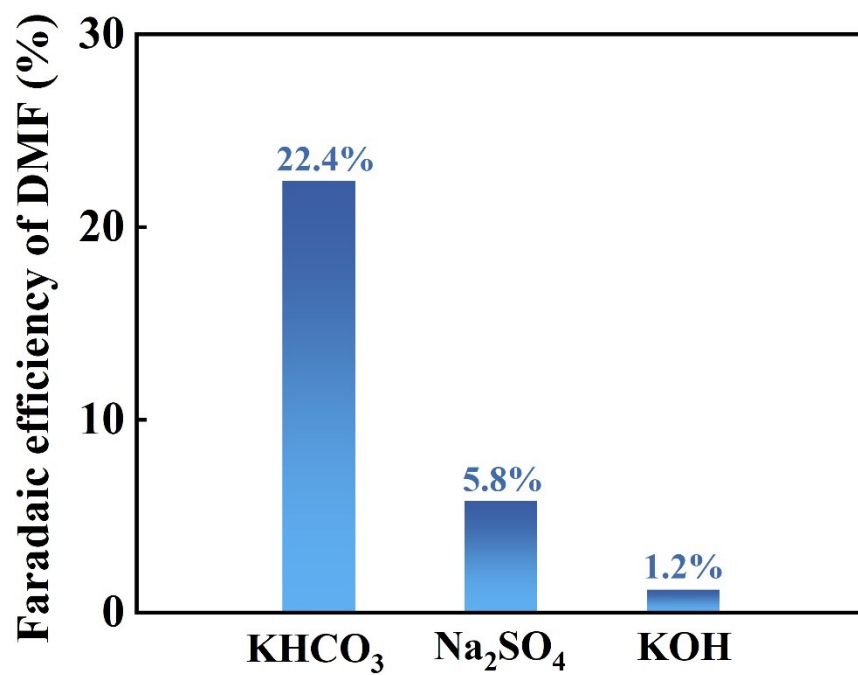

**Fig. S8** Faradaic efficiency of different electrolyte solutions for the synthesis of DMF from  $\text{CO}_2$  and dimethylamine via  $\text{InN}_3$ .

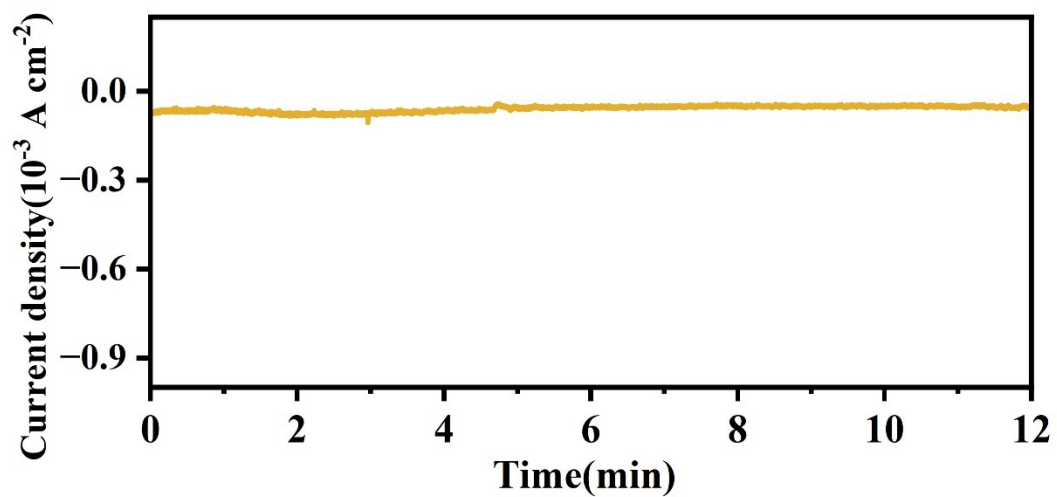

**Fig. S9** Chronoamperometric curves for electrocatalytic synthesis of DMF from CO<sub>2</sub> and dimethylamine under -0.8 V over InN<sub>3</sub>.

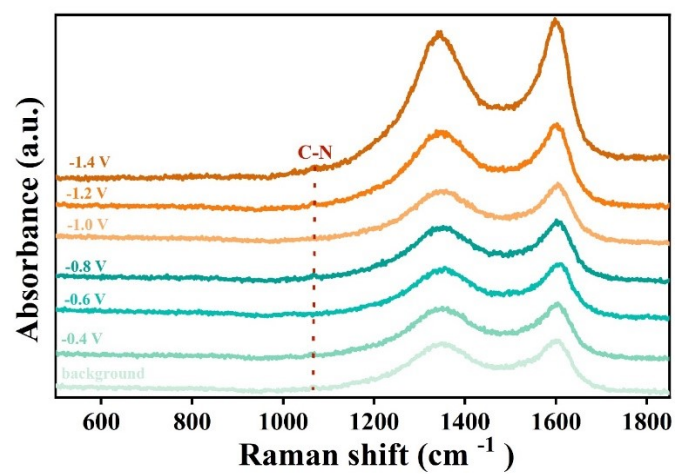

**Fig. S10** In situ Raman spectra of InN<sub>4</sub> for electrocatalytic reduction of CO<sub>2</sub> and dimethylamine to synthesize DMF.



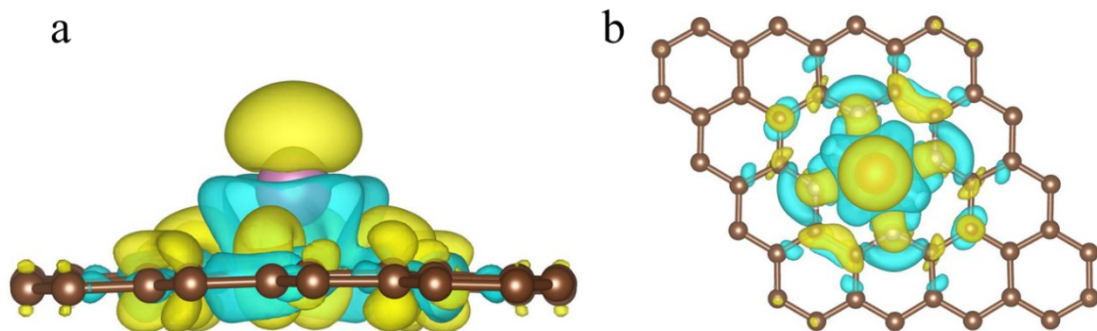

**Fig. S11** Charge density difference of  $\text{InN}_3$ . Accordingly, electron accumulation and depletion regions are indicated by yellow and cyan, respectively.

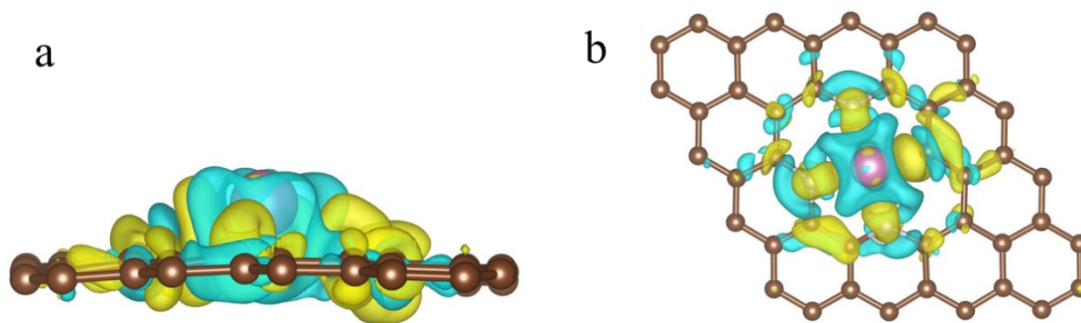

**Fig. S12** Charge density difference of  $\text{InN}_3$ . Accordingly, electron accumulation and depletion regions are indicated by yellow and cyan, respectively.

## Notes and references

1. G. Kresse and J. Furthmüller, *Computational Materials Science*, 1996, **6**, 15-50.
2. G. Kresse and J. Furthmüller, *Physical Review B*, 1996, **54**, 11169-11186.
3. J. P. Perdew, K. Burke and M. Ernzerhof, *Physical Review Letters*, 1997, **78**, 1396-1396.
4. G. Kresse and D. Joubert, *Physical Review B*, 1999, **59**, 1758-1775.
5. P. E. Blöchl, *Physical Review B*, 1994, **50**, 17953-17979.
6. S. Grimme, J. Antony, S. Ehrlich and H. Krieg, *The Journal of Chemical Physics*, 2010, **132**.
